# Supplementary material for: Tobacco industry pricing strategies for single cigarettes and multistick packs after excise tax increases in Colombia
Source: HighWire-hosted journal article supplement (doi:10.1136/tobaccocontrol-2022-057333), 2022-05-31
Supplement: tobaccocontrol-2022-057333supp001_data_supplement.pdf [file tobaccocontrol-2022-057333supp001_data_supplement.pdf]

Appendix Table I: Descriptive results of the Survey

| Variables                                        | 2016      |         | 2017      |         | P-value       |
|--------------------------------------------------|-----------|---------|-----------|---------|---------------|
|                                                  | Frequency | Percent | Frequency | Percent |               |
| <b>Do you smoke Daily?</b>                       |           |         |           |         | <b>0.12</b>   |
| No                                               | 284       | 16.7    | 319       | 18.8    |               |
| Yes                                              | 1413      | 83.3    | 1378      | 81.2    |               |
| Total                                            | 1697      | 100.0   | 1697      | 100.0   |               |
| <b>Place of last purchase</b>                    |           |         |           |         | <b>0.001</b>  |
| Bar, restaurant, cafeteria                       | 14        | 0.8     | 6         | 0.4     |               |
| Cigar store, liquor store                        | 602       | 35.5    | 140       | 8.2     |               |
| Duty Free                                        | 2         | 0.1     | 2         | 0.1     |               |
| Large departmental stores                        | 99        | 5.8     | 63        | 3.7     |               |
| Neighbourhood shop                               | 31        | 1.8     | 462       | 27.2    |               |
| San Andresitos                                   | 2         | 0.1     | 3         | 0.2     |               |
| Service station                                  | 5         | 0.3     | 3         | 0.2     |               |
| Street vendor                                    | 915       | 53.9    | 1007      | 59.3    |               |
| Don't remember/Don't know                        | 27        | 1.6     | 11        | 0.6     |               |
| Total                                            | 1697      | 100.0   | 1697      | 100.0   |               |
| <b>Presentation* of last purchase?</b>           |           |         |           |         | <b>0.0005</b> |
| Loose sticks                                     | 1048      | 61.8    | 1239      | 73.0    |               |
| Pack                                             | 639       | 37.7    | 450       | 26.5    |               |
| Carton                                           | 10        | 0.6     | 8         | 0.5     |               |
| Total                                            | 1697      | 100.0   | 1697      | 100.0   |               |
| <b>Pack size/ Number of cigarettes per pack?</b> |           |         |           |         | <b>0.001</b>  |
| 10                                               | 395       | 23.3    | 298       | 17.6    |               |

|                                                                                                                                                                                                                                          |      |       |      |       |              |
|------------------------------------------------------------------------------------------------------------------------------------------------------------------------------------------------------------------------------------------|------|-------|------|-------|--------------|
| 14                                                                                                                                                                                                                                       | 0    | 0     | 1    | 0.1   |              |
| 18                                                                                                                                                                                                                                       | 12   | 0.7   | 5    | 0.3   |              |
| 20                                                                                                                                                                                                                                       | 229  | 13.5  | 141  | 8.3   |              |
| Total                                                                                                                                                                                                                                    | 636  | 37.5  | 450  | 26.5  |              |
| <b>What did you think of while purchasing your last cigarette?</b>                                                                                                                                                                       |      |       |      |       | <b>0.028</b> |
| Less harmful                                                                                                                                                                                                                             | 78   | 4.6   | 49   | 2.9   |              |
| Price                                                                                                                                                                                                                                    | 171  | 10.1  | 165  | 9.7   |              |
| Taste                                                                                                                                                                                                                                    | 1448 | 85.3  | 1483 | 87.4  |              |
| Total                                                                                                                                                                                                                                    | 1697 | 100.0 | 1697 | 100.0 |              |
| <ul style="list-style-type: none"> <li>➤ *Quantity of cigarettes purchased such as single stick or multi-stick packs or cartons</li> <li>➤ Categorical data compared between groups with the use of Pearson chi-square tests.</li> </ul> |      |       |      |       |              |

**Source:** Authors' own calculations, using the data from the DEICS-COL survey

*Appendix Table II: Frequency of Smoking with respect to Brands (2016- 2017)*

| Year        | 2016 | 2017 | Total |
|-------------|------|------|-------|
| Win         | 5    | 9    | 14    |
| D&J         | 42   | 65   | 107   |
| Gold City   | 0    | 1    | 1     |
| Djarum      | 1    | 0    | 1     |
| Brass       | 0    | 3    | 3     |
| Consul      | 0    | 4    | 4     |
| Empire      | 0    | 1    | 1     |
| Golden Deer | 11   | 7    | 18    |
| Golden Seal | 1    | 1    | 2     |

|                          |            |            |             |
|--------------------------|------------|------------|-------------|
| Fly                      | 3          | 0          | 3           |
| Jaisalmer                | 2          | 0          | 2           |
| Modern                   | 3          | 0          | 3           |
| American Gold            | 1          | 0          | 1           |
| Ibiza                    | 1          | 1          | 2           |
| Piel Roja                | 37         | 40         | 77          |
| Belfort                  | 0          | 2          | 2           |
| Starlite                 | 63         | 57         | 120         |
| Tropical                 | 1          | 0          | 1           |
| Ruby                     | 0          | 2          | 2           |
| <b>Total Economy*</b>    | <b>171</b> | <b>193</b> | <b>364</b>  |
| Green                    | 84         | 95         | 179         |
| Pall Mall                | 1          | 5          | 6           |
| Premier                  | 10         | 5          | 15          |
| Fortuna                  | 4          | 0          | 4           |
| Belmont                  | 240        | 198        | 438         |
| Meridiano                | 0          | 2          | 2           |
| Motana                   | 0          | 1          | 1           |
| Boston                   | 283        | 128        | 411         |
| Mustang                  | 232        | 173        | 405         |
| Rothmans                 | 0          | 21         | 2           |
| L&M                      | 11         | 17         | 28          |
| Royal                    | 3          | 0          | 3           |
| <b>Total Mid-priced*</b> | <b>868</b> | <b>645</b> | <b>1513</b> |
| Jet                      | 14         | 6          | 20          |
| Chesterfield             | 0          | 169        | 169         |

|                       |            |            |             |
|-----------------------|------------|------------|-------------|
| Kool                  | 44         | 7          | 51          |
| Camel                 | 1          | 1          | 2           |
| Lucky Strike          | 187        | 368        | 555         |
| Marlboro              | 410        | 307        | 717         |
| Montreal              | 1          | 1          | 2           |
| Nat Sherman           | 1          | 0          | 1           |
| <b>Total Premium*</b> | <b>658</b> | <b>859</b> | <b>1517</b> |
| <b>Total</b>          | 1697       | 1697       | 3394        |

\*Pearson chi-square tests significant at the 1% level (p-value = 0.000)

**Source:** Authors' own calculations, using the database of Colombia's National Administrative Department of Statistics (DANE).

*Appendix Table III: Changes in the real price and tax for different presentation of cigarette Brands between 2016-2017 (all monetary figures in COP)*

| Brands    | No. of cigarettes | Total price 2016 | Total price 2017 | Specific Tax 2016 | Ad valor em 2016 | Excise tax 2016 | VAT 2016 | Total tax 2016 | Net price 2016 | Specific Tax 2017 | Ad valor em 2017 | Excise tax 2017 | VAT 2017 | Total tax 2017 | Net price 2017 | Total price increase | Total tax increase | Tobacco industry revenue increase | % of price change that is government tax | % of price change that is tobacco industry revenue |
|-----------|-------------------|------------------|------------------|-------------------|------------------|-----------------|----------|----------------|----------------|-------------------|------------------|-----------------|----------|----------------|----------------|----------------------|--------------------|-----------------------------------|------------------------------------------|----------------------------------------------------|
| Win       | Loose             | 100              | 200              | 35                | 10               | 45              | 14       | 59             | 41             | 70                | 20               | 90              | 32       | 122            | 78             | 92                   | 59                 | 34                                | 63                                       | 37                                                 |
| D&J       | Loose             | 175              | 200              | 35                | 17.5             | 52.5            | 24       | 77             | 98             | 70                | 20               | 90              | 32       | 122            | 78             | 12                   | 40                 | -28                               | 334                                      | -234                                               |
| Starlite  | Loose             | 200              | 300              | 35                | 20               | 55              | 28       | 83             | 117            | 70                | 30               | 100             | 48       | 148            | 152            | 85                   | 59                 | 26                                | 70                                       | 30                                                 |
| Piel Roja | Loose             | 200              | 300              | 35                | 20               | 55              | 28       | 83             | 117            | 70                | 30               | 100             | 48       | 148            | 152            | 85                   | 59                 | 26                                | 70                                       | 30                                                 |
| Premier   | Loose             | 200              | 300              | 35                | 20               | 55              | 28       | 83             | 117            | 70                | 30               | 100             | 48       | 148            | 152            | 85                   | 59                 | 26                                | 70                                       | 30                                                 |
| L&M       | Loose             | 300              | 300              | 35                | 30               | 65              | 41       | 106            | 194            | 70                | 30               | 100             | 48       | 148            | 152            | -23                  | 34                 | -56                               | -149                                     | 249                                                |
| Mustang   | Loose             | 300              | 400              | 35                | 30               | 65              | 41       | 106            | 194            | 70                | 40               | 110             | 64       | 174            | 226            | 77                   | 59                 | 18                                | 77                                       | 23                                                 |
| Belmont   | Loose             | 300              | 400              | 35                | 30               | 65              | 41       | 106            | 194            | 70                | 40               | 110             | 64       | 174            | 226            | 77                   | 59                 | 18                                | 77                                       | 23                                                 |

|                     |       |      |      |     |     |     |     |      |      |      |     |      |     |      |      |      |      |      |      |      |
|---------------------|-------|------|------|-----|-----|-----|-----|------|------|------|-----|------|-----|------|------|------|------|------|------|------|
| <b>Boston</b>       | Loose | 300  | 400  | 35  | 30  | 65  | 41  | 106  | 194  | 70   | 40  | 110  | 64  | 174  | 226  | 77   | 59   | 18   | 77   | 23   |
| <b>Green</b>        | Loose | 300  | 400  | 35  | 30  | 65  | 41  | 106  | 194  | 70   | 40  | 110  | 64  | 174  | 226  | 77   | 59   | 18   | 77   | 23   |
| <b>Marlboro</b>     | Loose | 400  | 500  | 35  | 40  | 75  | 55  | 130  | 270  | 70   | 50  | 120  | 80  | 200  | 300  | 70   | 60   | 10   | 86   | 14   |
| <b>Kool</b>         | Loose | 400  | 500  | 35  | 40  | 75  | 55  | 130  | 270  | 70   | 50  | 120  | 80  | 200  | 300  | 70   | 60   | 10   | 86   | 14   |
| <b>Lucky Strike</b> | Loose | 500  | 500  | 35  | 50  | 85  | 69  | 154  | 346  | 70   | 50  | 120  | 80  | 200  | 300  | -38  | 34   | -72  | -91  | 191  |
|                     |       |      |      |     |     |     |     |      |      |      |     |      |     |      |      |      |      |      |      |      |
| <b>Pall Mall</b>    | 10    | 1000 | 2200 | 350 | 100 | 450 | 138 | 588  | 412  | 700  | 220 | 920  | 351 | 1271 | 929  | 1125 | 639  | 486  | 57   | 43   |
| <b>Starlite</b>     | 10    | 1000 | 1550 | 350 | 100 | 450 | 138 | 588  | 412  | 700  | 155 | 855  | 247 | 1102 | 448  | 475  | 470  | 4    | 99   | 1    |
| <b>L&amp;M</b>      | 10    | 1200 | 1800 | 350 | 120 | 470 | 166 | 636  | 564  | 700  | 180 | 880  | 287 | 1167 | 633  | 510  | 484  | 26   | 95   | 5    |
| <b>Premier</b>      | 10    | 1450 | 2000 | 350 | 145 | 495 | 200 | 695  | 755  | 700  | 200 | 900  | 319 | 1219 | 781  | 441  | 472  | -31  | 107  | -7   |
| <b>Mustang</b>      | 10    | 1800 | 2500 | 350 | 180 | 530 | 248 | 778  | 1022 | 700  | 250 | 950  | 399 | 1349 | 1151 | 565  | 512  | 52   | 91   | 9    |
| <b>Green</b>        | 10    | 1800 | 2500 | 350 | 180 | 530 | 248 | 778  | 1022 | 700  | 250 | 950  | 399 | 1349 | 1151 | 565  | 512  | 52   | 91   | 9    |
| <b>Belmont</b>      | 10    | 1800 | 2300 | 350 | 180 | 530 | 248 | 778  | 1022 | 700  | 230 | 930  | 367 | 1297 | 1003 | 365  | 460  | -96  | 126  | -26  |
| <b>Boston</b>       | 10    | 1800 | 2400 | 350 | 180 | 530 | 248 | 778  | 1022 | 700  | 240 | 940  | 383 | 1323 | 1077 | 465  | 486  | -22  | 105  | -5   |
| <b>Marlboro</b>     | 10    | 2300 | 2800 | 350 | 230 | 580 | 317 | 897  | 1403 | 700  | 280 | 980  | 447 | 1427 | 1373 | 327  | 462  | -135 | 141  | -41  |
| <b>Lucky Strike</b> | 10    | 2400 | 3000 | 350 | 240 | 590 | 331 | 921  | 1479 | 700  | 300 | 1000 | 479 | 1479 | 1521 | 420  | 489  | -69  | 116  | -16  |
|                     |       |      |      |     |     |     |     |      |      |      |     |      |     |      |      |      |      |      |      |      |
| <b>Boston</b>       | 18    | 2000 | 4400 | 630 | 200 | 830 | 276 | 1106 | 894  | 1260 | 440 | 1700 | 703 | 2403 | 1997 | 2250 | 1214 | 1036 | 54   | 46   |
| <b>Piel Roja</b>    | 18    | 2500 | 3500 | 630 | 250 | 880 | 345 | 1225 | 1275 | 1260 | 350 | 1610 | 559 | 2169 | 1331 | 812  | 852  | -40  | 105  | -5   |
|                     |       |      |      |     |     |     |     |      |      |      |     |      |     |      |      |      |      |      |      |      |
| <b>Montreal</b>     | 20    | 1000 | 4000 | 700 | 100 | 800 | 138 | 938  | 62   | 1400 | 400 | 1800 | 639 | 2439 | 1561 | 2925 | 1430 | 1495 | 49   | 51   |
| <b>Golden Seal</b>  | 20    | 1300 | 3000 | 700 | 130 | 830 | 179 | 1009 | 291  | 1400 | 300 | 1700 | 479 | 2179 | 821  | 1602 | 1094 | 508  | 68   | 32   |
| <b>Golden Deer</b>  | 20    | 1500 | 2150 | 700 | 150 | 850 | 207 | 1057 | 443  | 1400 | 215 | 1615 | 343 | 1958 | 192  | 537  | 822  | -285 | 153  | -53  |
| <b>D&amp;J</b>      | 20    | 1600 | 2000 | 700 | 160 | 860 | 221 | 1081 | 519  | 1400 | 200 | 1600 | 319 | 1919 | 81   | 280  | 757  | -478 | 271  | -171 |
| <b>Starlite</b>     | 20    | 2000 | 3250 | 700 | 200 | 900 | 276 | 1176 | 824  | 1400 | 325 | 1725 | 519 | 2244 | 1006 | 1100 | 980  | 120  | 89   | 11   |
| <b>Win</b>          | 20    | 2000 | 1800 | 700 | 200 | 900 | 276 | 1176 | 824  | 1400 | 180 | 1580 | 287 | 1867 | -67  | -350 | 603  | -953 | -172 | 272  |
| <b>Piel Roja</b>    | 20    | 2050 | 3500 | 700 | 205 | 905 | 283 | 1188 | 862  | 1400 | 350 | 1750 | 559 | 2309 | 1191 | 1296 | 1032 | 264  | 80   | 20   |

|                     |    |      |      |     |     |      |     |      |      |      |     |      |      |      |      |      |      |      |      |     |
|---------------------|----|------|------|-----|-----|------|-----|------|------|------|-----|------|------|------|------|------|------|------|------|-----|
| <b>L&amp;M</b>      | 20 | 2100 | 3000 | 700 | 210 | 910  | 290 | 1200 | 900  | 1400 | 300 | 1700 | 479  | 2179 | 821  | 742  | 889  | -147 | 120  | -20 |
| <b>Premier</b>      | 20 | 2500 | 3600 | 700 | 250 | 950  | 345 | 1295 | 1205 | 1400 | 360 | 1760 | 575  | 2335 | 1265 | 912  | 943  | -31  | 103  | -3  |
| <b>Green</b>        | 20 | 2900 | 3000 | 700 | 290 | 990  | 400 | 1390 | 1510 | 1400 | 300 | 1700 | 479  | 2179 | 821  | -118 | 685  | -802 | -581 | 681 |
| <b>Mustang</b>      | 20 | 3200 | 4800 | 700 | 320 | 1020 | 441 | 1461 | 1739 | 1400 | 480 | 1880 | 766  | 2646 | 2154 | 1360 | 1075 | 284  | 79   | 21  |
| <b>Belmont</b>      | 20 | 3200 | 3900 | 700 | 320 | 1020 | 441 | 1461 | 1739 | 1400 | 390 | 1790 | 623  | 2413 | 1487 | 460  | 842  | -382 | 183  | -83 |
| <b>Pall Mall</b>    | 20 | 3300 | 4200 | 700 | 330 | 1030 | 455 | 1485 | 1815 | 1400 | 420 | 1820 | 671  | 2491 | 1709 | 652  | 894  | -242 | 137  | -37 |
| <b>Jet</b>          | 20 | 3400 | 8000 | 700 | 340 | 1040 | 469 | 1509 | 1891 | 1400 | 800 | 2200 | 1277 | 3477 | 4523 | 4345 | 1855 | 2490 | 43   | 57  |
| <b>Marlboro</b>     | 20 | 4000 | 5100 | 700 | 400 | 1100 | 552 | 1652 | 2348 | 1400 | 510 | 1910 | 814  | 2724 | 2376 | 799  | 948  | -149 | 119  | -19 |
| <b>Lucky Strike</b> | 20 | 4200 | 5550 | 700 | 420 | 1120 | 579 | 1699 | 2501 | 1400 | 555 | 1955 | 886  | 2841 | 2709 | 1034 | 1014 | 20   | 98   | 2   |

**Source:** Authors' own calculations, using the database of Colombia's National Administrative Department of Statistics (DANE).

*Appendix Table IV: Tax pass through for cigarette brands between 2007-2019 (all monetary figures in COP)*

| Year | Price Decomposition | President Con Filtro | Caribe Caja Blanda | Caribe Caja Dura | Premier Azul | Premier Menthol | Premier Rojo | Starlite Con Filtro | Pielroja Sin filtro | American Gold Con Filtro | Derby Caja Blanda | Pall Mall Kristal Frost | Mustang Rojo | Mustang Azul | Boston Azul | Boston Plata | Green Mento lado | Kent Blue | Marlboro Rojo | Lucky Strike Red |
|------|---------------------|----------------------|--------------------|------------------|--------------|-----------------|--------------|---------------------|---------------------|--------------------------|-------------------|-------------------------|--------------|--------------|-------------|--------------|------------------|-----------|---------------|------------------|
| 2007 | Unit price          | 1407                 | 1652               | 1671             | 1849         | 1884            | 1946         | 1960                | 1975                | 2399                     | 2637              | 2294                    | 2241         | 2323         | N/A         | N/A          | 2550             | 4800      | 4034          | 4565             |
|      | Total tax           | 1237                 | 1293               | 1297             | 1338         | 1346            | 1360         | 1364                | 1367                | 1464                     | 1519              | 1440                    | 1428         | 1447         | N/A         | N/A          | 1499             | 2014      | 1838          | 1960             |
|      | Net price           | 170                  | 359                | 373              | 511          | 538             | 586          | 596                 | 608                 | 608                      | 935               | 1118                    | 854          | 813          | 877         | N/A          | N/A              | 1051      | 2787          | 2195             |
| 2008 | Unit price          | 1616                 | 1664               | 1658             | 1984         | 2005            | 2007         | 2047                | 1802                | 2275                     | 2566              | 2360                    | 2553         | 2541         | N/A         | N/A          | 2469             | 4359      | 3481          | 4329             |
|      | Total tax           | 1251                 | 1263               | 1261             | 1339         | 1344            | 1344         | 1354                | 1296                | 1408                     | 1477              | 1428                    | 1474         | 1472         | N/A         | N/A          | 1454             | 1904      | 1695          | 1897             |
|      | Net price           | 365                  | 401                | 397              | 645          | 661             | 662          | 693                 | 506                 | 506                      | 867               | 1089                    | 932          | 1079         | 1070        | N/A          | N/A              | 1015      | 2455          | 1786             |

|             |                     |      |      |      |      |      |      |      |      |      |      |      |      |      |      |      |      |      |      |      |
|-------------|---------------------|------|------|------|------|------|------|------|------|------|------|------|------|------|------|------|------|------|------|------|
|             | Change in net price | 203  | 61   | 43   | 161  | 152  | 108  | 128  | -70  | -19  | 29   | 122  | 308  | 239  | N/A  | N/A  | 19   | -185 | -294 | -36  |
| <b>2009</b> | Unit price          | 1657 | 1675 | 1776 | 2032 | 2026 | 2080 | 2002 | 1660 | 2065 | 2486 | 2188 | 2556 | 2527 | N/A  | N/A  | 2490 | 4016 | 3802 | 4121 |
|             | Total tax           | 1226 | 1230 | 1254 | 1315 | 1314 | 1327 | 1308 | 1227 | 1323 | 1423 | 1352 | 1440 | 1433 | N/A  | N/A  | 1424 | 1787 | 1736 | 1812 |
|             | Net price           | 431  | 445  | 522  | 717  | 713  | 754  | 694  | 433  | 742  | 1063 | 836  | 1116 | 1094 | N/A  | N/A  | 1066 | 2229 | 2066 | 2309 |
|             | Change in net price | 90   | 70   | 151  | 114  | 94   | 135  | 46   | -40  | -68  | 45   | -35  | 108  | 94   | N/A  | N/A  | 117  | -66  | 396  | 36   |
| <b>2010</b> | Unit price          | 1713 | 1729 | 1919 | 2087 | 2110 | 2126 | 2135 | 1827 | 2079 | 2744 | 2279 | 2445 | 2472 | N/A  | N/A  | 2464 | 4000 | 3909 | 4148 |
|             | Total tax           | 1145 | 1148 | 1194 | 1234 | 1239 | 1243 | 1245 | 1172 | 1232 | 1390 | 1279 | 1319 | 1325 | N/A  | N/A  | 1323 | 1689 | 1667 | 1724 |
|             | Net price           | 569  | 580  | 725  | 853  | 871  | 883  | 890  | 655  | 847  | 1354 | 1000 | 1126 | 1147 | N/A  | N/A  | 1141 | 2312 | 2242 | 2424 |
|             | Change in net price | 155  | 154  | 225  | 166  | 187  | 160  | 224  | 240  | 135  | 334  | 198  | 55   | 97   | N/A  | N/A  | 118  | 172  | 259  | 208  |
| <b>2011</b> | Unit price          | 1847 | 1580 | 1652 | 2210 | 2329 | 2357 | 2333 | 1918 | 1955 | 2754 | 2944 | 2822 | 2704 | N/A  | N/A  | 2565 | 4417 | 4113 | 4355 |
|             | Total tax           | 1179 | 1115 | 1132 | 1265 | 1293 | 1300 | 1294 | 1196 | 1204 | 1394 | 1440 | 1411 | 1383 | N/A  | N/A  | 1350 | 1790 | 1718 | 1776 |
|             | Net price           | 668  | 465  | 520  | 945  | 1035 | 1057 | 1038 | 722  | 750  | 1359 | 1505 | 1411 | 1322 | N/A  | N/A  | 1216 | 2627 | 2395 | 2580 |
|             | Change in net price | 112  | -102 | -189 | 110  | 184  | 193  | 168  | 82   | -78  | 35   | 527  | 310  | 200  | N/A  | N/A  | 100  | 367  | 203  | 210  |
| <b>2012</b> | Unit price          | 1854 | 1681 | 1694 | 2425 | 2354 | 2363 | 2567 | 2154 | 2044 | 2755 | 2666 | 2796 | 2774 | 2804 | 2791 | 2765 | 4109 | 3953 | 3570 |
|             | Total tax           | 1184 | 1143 | 1146 | 1320 | 1303 | 1305 | 1354 | 1256 | 1229 | 1399 | 1378 | 1408 | 1403 | 1411 | 1407 | 1401 | 1721 | 1684 | 1592 |
|             | Net price           | 670  | 538  | 548  | 1105 | 1051 | 1058 | 1213 | 898  | 814  | 1357 | 1289 | 1387 | 1371 | 1394 | 1384 | 1364 | 2388 | 2270 | 1977 |
|             | Change in net price | 24   | 88   | 45   | 192  | 50   | 36   | 209  | 200  | 89   | 43   | -166 | 23   | 93   | N/A  | N/A  | 189  | -152 | -46  | -517 |
| <b>2013</b> | Unit price          | 1837 | 1681 | 1645 | 2543 | 2571 | 2581 | 1867 | 2166 | 2033 | 2768 | 2815 | 2820 | 2783 | 2817 | 2820 | 2792 | 3975 | 4017 | 3661 |

|             |                     |      |      |      |      |      |      |      |      |      |      |      |      |      |      |      |      |      |      |      |
|-------------|---------------------|------|------|------|------|------|------|------|------|------|------|------|------|------|------|------|------|------|------|------|
|             | Total tax           | 1177 | 1140 | 1132 | 1345 | 1352 | 1354 | 1185 | 1256 | 1224 | 1399 | 1410 | 1411 | 1403 | 1410 | 1411 | 1405 | 1686 | 1696 | 1611 |
|             | Net price           | 659  | 541  | 513  | 1198 | 1219 | 1226 | 683  | 910  | 809  | 1369 | 1405 | 1409 | 1381 | 1407 | 1409 | 1387 | 2289 | 2321 | 2050 |
|             | Change in net price | 10   | 20   | -18  | 126  | 200  | 201  | -493 | 40   | 20   | 54   | 156  | 64   | 52   | 55   | 68   | 65   | -25  | 121  | 134  |
| <b>2014</b> | Unit price          | 1782 | 1720 | 1731 | 2647 | 2678 | 2680 | 1795 | 2177 | 2061 | 2956 | 3124 | 2872 | 2871 | 2881 | 2847 | 2853 | 4094 | 4130 | 4080 |
|             | Total tax           | 1130 | 1115 | 1118 | 1336 | 1343 | 1344 | 1133 | 1224 | 1196 | 1409 | 1449 | 1390 | 1389 | 1391 | 1383 | 1385 | 1680 | 1689 | 1677 |
|             | Net price           | 652  | 605  | 613  | 1311 | 1335 | 1336 | 661  | 953  | 864  | 1547 | 1675 | 1483 | 1482 | 1489 | 1463 | 1468 | 2414 | 2441 | 2403 |
|             | Change in net price | 5    | 74   | 110  | 137  | 140  | 134  | -8   | 60   | 71   | 205  | 297  | 102  | 128  | 110  | 82   | 108  | 170  | 166  | 394  |
| <b>2015</b> | Unit price          | 1791 | 1733 | 1732 | 2655 | 2786 | 2694 | 1832 | 2250 | 2110 | 2829 | 3153 | 2963 | 2929 | 2990 | 3056 | 2985 | 4049 | 4171 | 4063 |
|             | Total tax           | 1170 | 1156 | 1156 | 1376 | 1407 | 1385 | 1180 | 1279 | 1246 | 1417 | 1494 | 1449 | 1441 | 1455 | 1471 | 1454 | 1707 | 1736 | 1710 |
|             | Net price           | 621  | 577  | 576  | 1279 | 1379 | 1309 | 652  | 971  | 864  | 1412 | 1659 | 1514 | 1488 | 1535 | 1585 | 1531 | 2342 | 2435 | 2352 |
|             | Change in net price | -12  | -11  | -20  | 5    | 82   | 11   | 9    | 45   | 24   | -91  | 31   | 73   | 48   | 88   | 163  | 104  | -4   | 62   | 16   |
| <b>2016</b> | Unit price          | 1801 | 1730 | 1792 | 2719 | 2743 | 2716 | 1886 | 2337 | 2212 | 2989 | 3159 | 3047 | 3065 | 3047 | 3092 | 3028 | 3958 | 4163 | 4162 |
|             | Total tax           | 1181 | 1164 | 1179 | 1400 | 1405 | 1399 | 1201 | 1309 | 1279 | 1464 | 1504 | 1478 | 1482 | 1477 | 1488 | 1473 | 1694 | 1743 | 1743 |
|             | Net price           | 620  | 566  | 613  | 1319 | 1338 | 1317 | 685  | 1029 | 933  | 1525 | 1655 | 1569 | 1583 | 1570 | 1604 | 1555 | 2263 | 2420 | 2419 |
|             | Change in net price | 28   | 17   | 65   | 101  | 24   | 70   | 63   | 104  | 110  | 180  | 75   | 127  | 166  | 108  | 94   | 97   | 33   | 101  | 179  |
| <b>2017</b> | Unit price          | 2282 | 2554 | 2314 | 3111 | 2622 | 3283 | 2410 | 3026 | 2531 | 3525 | 3286 | 3306 | 3610 | 3639 | 3424 | 3336 | 3762 | 4788 | 4512 |
|             | Total tax           | 1993 | 2063 | 2001 | 2208 | 2081 | 2252 | 2026 | 2186 | 2057 | 2315 | 2253 | 2258 | 2337 | 2345 | 2289 | 2266 | 2377 | 2643 | 2572 |
|             | Net price           | 289  | 491  | 313  | 903  | 541  | 1031 | 384  | 840  | 474  | 1210 | 1033 | 1048 | 1273 | 1294 | 1135 | 1070 | 1385 | 2145 | 1940 |



|                                                                                                                            |                     |      |      |      |      |      |      |      |      |      |      |      |      |      |      |      |      |      |      |      |
|----------------------------------------------------------------------------------------------------------------------------|---------------------|------|------|------|------|------|------|------|------|------|------|------|------|------|------|------|------|------|------|------|
|                                                                                                                            | Change in net price | -287 | -35  | -257 | -324 | -703 | -194 | -252 | -116 | -394 | -209 | -506 | -412 | -200 | -166 | -357 | -376 | -720 | -106 | -310 |
| <b>2018</b>                                                                                                                | Unit price          | 3516 | 3622 | 3463 | 4353 | 2978 | 4280 | 3609 | 4008 | 2536 | 4297 | 3279 | 3523 | 3867 | 4162 | 3923 | 3614 | 3736 | 5784 | 5663 |
|                                                                                                                            | Total tax           | 2947 | 2975 | 2933 | 3164 | 2807 | 3146 | 2971 | 3075 | 2693 | 3150 | 2885 | 2949 | 3038 | 3115 | 3053 | 2972 | 3004 | 3536 | 3504 |
|                                                                                                                            | Net price           | 569  | 647  | 530  | 1189 | 170  | 1135 | 638  | 933  | -157 | 1147 | 393  | 574  | 829  | 1047 | 870  | 641  | 732  | 2248 | 2158 |
|                                                                                                                            | Change in net price | 289  | 172  | 226  | 314  | -354 | 137  | 266  | 119  | -616 | -25  | -607 | -441 | -404 | -206 | -230 | -395 | -610 | 170  | 279  |
| <b>2019</b>                                                                                                                | Unit price          | 3992 | 4132 | 4256 | 3917 | 2706 | 4040 | 4190 | 4766 | 2239 | 5125 | N/A  | 3720 | 4162 | 4951 | 3874 | 3658 | 3640 | 6865 | 6904 |
|                                                                                                                            | Total tax           | 3165 | 3202 | 3234 | 3146 | 2831 | 3178 | 3217 | 3366 | 2710 | 3459 | N/A  | 3095 | 3209 | 3413 | 3135 | 3078 | 3074 | 3911 | 3921 |
|                                                                                                                            | Net price           | 827  | 931  | 1022 | 771  | -125 | 862  | 973  | 1400 | -471 | 1666 | N/A  | 626  | 952  | 1537 | 740  | 580  | 566  | 2954 | 2983 |
|                                                                                                                            | Change in net price | 272  | 300  | 506  | -388 | -291 | -245 | 351  | 490  | -318 | 547  | N/A  | 66   | 144  | 516  | -109 | -46  | -147 | 761  | 878  |
| *Only brands for which pricing information was available for all the years between 2007-2019 were included in the analysis |                     |      |      |      |      |      |      |      |      |      |      |      |      |      |      |      |      |      |      |      |
| **N/A: Data not available                                                                                                  |                     |      |      |      |      |      |      |      |      |      |      |      |      |      |      |      |      |      |      |      |
| Economy Brands, Mid-Priced Brands, Premium Brands                                                                          |                     |      |      |      |      |      |      |      |      |      |      |      |      |      |      |      |      |      |      |      |

**Source:** Authors' own calculations, using the database of Colombia's National Administrative Department of Statistics (DANE).
